# Supplementary material
Source: HighWire-hosted journal article supplement (https://bmjopen.bmj.com/content/7/12/e019503)
Supplement: inline-supplementary-material-1 [file inline-supplementary-material-1.pdf]

**Supplementary Table S1.** List of diseases and conditions candidate to be tested as predictors of one-year mortality

| Diagnostic category                                                   | Disease/condition                                      | ICD-9 CM code                                                                | ATC code                                                                                                                                                                                                   |
|-----------------------------------------------------------------------|--------------------------------------------------------|------------------------------------------------------------------------------|------------------------------------------------------------------------------------------------------------------------------------------------------------------------------------------------------------|
| Infectious and parasitic diseases                                     | HIV infection                                          | 042.x-044.x                                                                  | Zidovudine (AZT) (J05AF01, J05AR01, J05AR04, J05AR05), Didanosine (DDI) (J05AF02), Zalcitabine (DDC) (J05AF03), Pentamidine (P01CX01), Clarithromycin (J01FA09), Rifabutin (J04AB04), Atovaquone (P01AX06) |
|                                                                       | Tuberculosis                                           | 010.x - 018.x                                                                | Anti-tuberculosis antibiotics (J04AB)                                                                                                                                                                      |
| Neoplasms                                                             | Lymphoma                                               | 200.00-202.38, 202.50-203.01, 203.8x, 238.6x, 273.3x, V10.71, V10.72, V10.79 |                                                                                                                                                                                                            |
|                                                                       | Metastatic cancer                                      | 196.0x-199.1x                                                                |                                                                                                                                                                                                            |
|                                                                       | Cancer, without metastasis                             | 140.0x-172.9x, 174.0x-175.9x, 179.x-195.8x, V10.0x-V10.9x                    |                                                                                                                                                                                                            |
|                                                                       | Malignancy medication                                  |                                                                              | Antineoplastic (L01), Taxol (C07AB05), Interleukins (L03AC), Colony-stimulating factors (L03AA), Antinausea misc, ondansetron (A04)                                                                        |
| Endocrine, nutritional and metabolic diseases, and immunity disorders | Diabetes                                               | 250.x, 357.2, 362.0                                                          | Antidiabetic agents (A10)                                                                                                                                                                                  |
|                                                                       | Hypothyroidism                                         | 243.x-244.2, 244.8x, 244.9x                                                  | Thyroid replacement (H03A), Antithyroid agents (H03B)                                                                                                                                                      |
|                                                                       | Obesity                                                | 278.00-278.01                                                                |                                                                                                                                                                                                            |
|                                                                       | Weight loss                                            | 260.0x-263.9                                                                 |                                                                                                                                                                                                            |
|                                                                       | Disorders of fluid, electrolyte, and acid-base balance | 276.0x-276.9x                                                                |                                                                                                                                                                                                            |
|                                                                       | Gout                                                   | 274.x                                                                        | Colchicine (M04AC01), Uric acid inhibitors (M04AA, M04AB)                                                                                                                                                  |
| Diseases of the blood and blood-forming organs                        | Coagulation defects                                    | 286.0x-286.9x, 287.1x, 287.3x-287.5x                                         |                                                                                                                                                                                                            |
|                                                                       | Anaemias                                               | 280.0x, 280.1x-281.9x, 285.9x                                                | Marrow stimulants (L03AA), Erythropoietin (B03XA01)                                                                                                                                                        |
| Mental disorders                                                      | Dementia                                               | 290.x                                                                        |                                                                                                                                                                                                            |
|                                                                       | Psychosis                                              | 295.x-298.9x, 299.10-299.11                                                  | Butyrophenone derivates (N05AD), Phenothiazines (N05AA, N05AB, N05AC), Antipsychotic misc (N05AX), Tiotixene (N05AF04)                                                                                     |
|                                                                       | Depression                                             | 300.4x, 301.12, 309.0x, 309.1x, 311.x                                        | Tricyclic antidepressants (N06AA), Monoamine oxidase inhibitors (N04BD, N06AF, N06AG), SSRI, fluoxetine (N06AB03, N06CA03)                                                                                 |
|                                                                       | Bipolar disorders                                      | 296.0                                                                        | Lithium (N05AN)                                                                                                                                                                                            |
|                                                                       | Alcohol abuse                                          | 291.1x, 291.2x, 291.5x, 291.8x, 291.9x, 303.90-303.93, 305.00-305.03, V11.3x |                                                                                                                                                                                                            |
|                                                                       | Drug addition                                          | 292.0x, 292.82-292.89, 292.9x, 304.00-304.93, 305.20-305.93                  |                                                                                                                                                                                                            |
|                                                                       |                                                        |                                                                              |                                                                                                                                                                                                            |
|                                                                       |                                                        |                                                                              |                                                                                                                                                                                                            |

|                                    |                                                           |                                                                                                                                                                                  |                                                                                                                                                                                                                                                                                                                                                                                                                        |
|------------------------------------|-----------------------------------------------------------|----------------------------------------------------------------------------------------------------------------------------------------------------------------------------------|------------------------------------------------------------------------------------------------------------------------------------------------------------------------------------------------------------------------------------------------------------------------------------------------------------------------------------------------------------------------------------------------------------------------|
|                                    | Anxiety medication                                        |                                                                                                                                                                                  | Benzodiazepine derivatives (N05BA, N05CD), Meprobamate (N05BC01), Meprobamate combinations (N05BC51), Other anxiolytics (N05BX), Benzodiazepine related drugs (N05CF), Hypnotics and sedatives in combination, excl. barbiturates (N05CX01), Other psychostimulants and nootropics (N06BX)                                                                                                                             |
| Diseases of the nervous system     | Hemiplegia and hemiparesis<br>Other neurological diseases | 342.00-342.12, 342.9x-344.9x<br>331.9x, 332.0x, 333.4x, 333.5x, 334.0x-335.9x, 340.x, 341.1x-341.9x, 345.00-345.11, 345.40-345.51, 345.80-345.91, 348.1x, 348.3x, 780.3x, 784.3x |                                                                                                                                                                                                                                                                                                                                                                                                                        |
|                                    | Glaucoma<br>Epilepsy                                      | 365.x<br>345.x                                                                                                                                                                   | Ophtalmic miotics (S01E)<br>Anticonvulsants barbiturates and congeners (N03AA), Phenytoin and combinations (N03AB02, N03AB05, N03AB52), Misc anticonvulsants (N03AX)<br>Autononics L-Dopa (N04B), Selegiline (N04BD01)                                                                                                                                                                                                 |
|                                    | Parkinson's disease                                       | 332x                                                                                                                                                                             |                                                                                                                                                                                                                                                                                                                                                                                                                        |
| Diseases of the circulatory system | Acute myocardial infarction<br>Heart failure              | 410.x-412.x<br>398.91, 402.11, 402.91, 404.11, 404.13, 404.91, 404.93, 428.x                                                                                                     | Disopyramide (C01BA93), Vasodilator nitrates (C01DA), Digitalis glycosides (C01AA), Diuretic, loop (C03C), Procainamide (C01BA02), Quinidine (C01BA01, C01BA51, C01BA71)                                                                                                                                                                                                                                               |
|                                    | Arrhythmia                                                | 426.10, 426.11, 426.13, 426.20-426.53, 426.60-426.89, 427.0x, 427.2x, 427.31, 427.60, 427.9x, 785.0x, V45.0x, V53.3x                                                             | Class 1 A antiarrhythmics (C01BA),<br>Class 1 C antiarrhythmics (C01BC),<br>Class 1 I antiarrhythmics (C01BD)                                                                                                                                                                                                                                                                                                          |
|                                    | Valvular diseases                                         | 093.20-093.24, 394.0x-397.1x, 424.00-424.91, 746.3x-746.6x, V42.2x, V43.3x                                                                                                       |                                                                                                                                                                                                                                                                                                                                                                                                                        |
|                                    | Vascular diseases                                         | 440.0x-440.9x, 441.2x, 441.4x, 441.7x, 441.9x, 443.1x-443.9x, 447.1x, 557.1x, 557.9x, 785.4x, V43.4x                                                                             |                                                                                                                                                                                                                                                                                                                                                                                                                        |
|                                    | Cerebrovascular diseases<br>Hypertension                  | 430.x-438.x<br>401.x-405.x                                                                                                                                                       | ACE inhibitors (C09A, C09B), Alpha blockers (C04AX02, C04AB01, C04AB02, C02CA, C02LE), Antihypertensive vasodilators (C04, C01D, C07E), Beta-adrenergic blockers (C07),<br>Calcium channel blockers (C08), Clonidine (C02AC01, C02LC01, C02LC51), Diuretics, thiazides (C03A, C07B, C07D), Ganglionic blockers (C02B), Guanethidine (C02CC02, C02LF01), Methyl dopa (C02AB, C02LB), Rauwolfia alkaloids (C02AA, C02LA) |
|                                    | Coronary and peripheral vascular disease                  |                                                                                                                                                                                  | Anticoagulants (vitamin K antagonists, Factor Xa inhibitors, direct thrombin inhibitors, other) (B01AA, B01AB, B01AF, B01AE, B01AX01, B01AD10, B01AD12), Pentoxifylline (C04AD03), Ticlopidine (B01AC05)                                                                                                                                                                                                               |

|                                                              |                                |                                                                                                                                                       |                                                                                                                                                                                                                                                                                           |
|--------------------------------------------------------------|--------------------------------|-------------------------------------------------------------------------------------------------------------------------------------------------------|-------------------------------------------------------------------------------------------------------------------------------------------------------------------------------------------------------------------------------------------------------------------------------------------|
| Diseases of the respiratory system                           | Hyperlipidemia                 |                                                                                                                                                       | Lipid lowering agents (C10)<br>Beta agonist bronchodilators (R03AA, R03AB, R03AC),<br>Xanthines (R03DA, R03DB, R03DA20), Cromolyn (R01AC01, R03BC01, R01AC51, S01GX01, S01GX51),<br>Inhaled corticosteroids (R03BA)<br>Mucolytics (R05CB, R05FB01, R05FA01), Pancreatic enzymes (A09AA02) |
|                                                              | Chronic pulmonary diseases     | 490.x-492.8x, 493.00-493.91, 494.x, 495.0x-505.x, 506.4x                                                                                              |                                                                                                                                                                                                                                                                                           |
|                                                              | Cystic fibrosis                | 277.0                                                                                                                                                 |                                                                                                                                                                                                                                                                                           |
| Diseases of the digestive system                             | Peptic ulcer                   | 531.x-534.x                                                                                                                                           | Histamine H2 blockers (A02BA), Prostaglandin, Misoprostil (A02BB), Proton pump inhibitors, Omeprazole (A02BC01, A02BD05, A02BD01)<br>Ammonia detoxicants (A06AD)                                                                                                                          |
|                                                              | Liver diseases                 | 070.32, 070.33, 070.54, 456.0x, 456.1x, 456.20, 456.21, 571.0x, 571.2x, 571.3x, 571.40-571.49, 571.5x, 571.6x, 571.8x, 571.9x, 572.3x, 572.8x, V42.7x |                                                                                                                                                                                                                                                                                           |
|                                                              | Crohn's and ulcerative colitis | 555.x-556.x                                                                                                                                           |                                                                                                                                                                                                                                                                                           |
| Diseases of the genitourinary system                         | Kidney diseases                | 582.x, 583.0, 583.1, 583.4, 583.7, 583.8, 584.6, 585.x, 586.x, 588.x                                                                                  | Sulfasalazine (A07EC01), Olsalazine (A07EC03), Mesalazine (A07EC02)<br>Potassium removing resins, Kayexalate (V01AE01)                                                                                                                                                                    |
|                                                              | Kidney dialysis                | V56.0                                                                                                                                                 |                                                                                                                                                                                                                                                                                           |
|                                                              | Kidney transplantation         | 55.6 (procedure)                                                                                                                                      |                                                                                                                                                                                                                                                                                           |
| Diseases of the musculoskeletal system and connective tissue | Rheumatologic conditions       | 390.x, 391.x, 714.0x, 714.1, 714.3, 714.9x, 720.0x-720.9x, 725.x                                                                                      | Systemic corticosteroids (M01BA), Gold salts (M01CB), Hydroxychloroquin (P01BA02)                                                                                                                                                                                                         |
| Other conditions                                             | Transplantation                |                                                                                                                                                       | Cyclosporine-A (L04AD01), Azathioprine (L04AX01)<br>Narcotics (N02), NSAIDs (M01A)                                                                                                                                                                                                        |
|                                                              | Pain and inflammation          |                                                                                                                                                       |                                                                                                                                                                                                                                                                                           |

ICD-9 CM: International Classification of Diseases, Ninth Revision, Clinical Modification; primary or secondary diagnosis fields

ATC: Anatomical Therapeutic Chemical classification system
